# Supplementary material
Source: HighWire-hosted journal article supplement (https://ard.bmj.com/content/83/3/324)

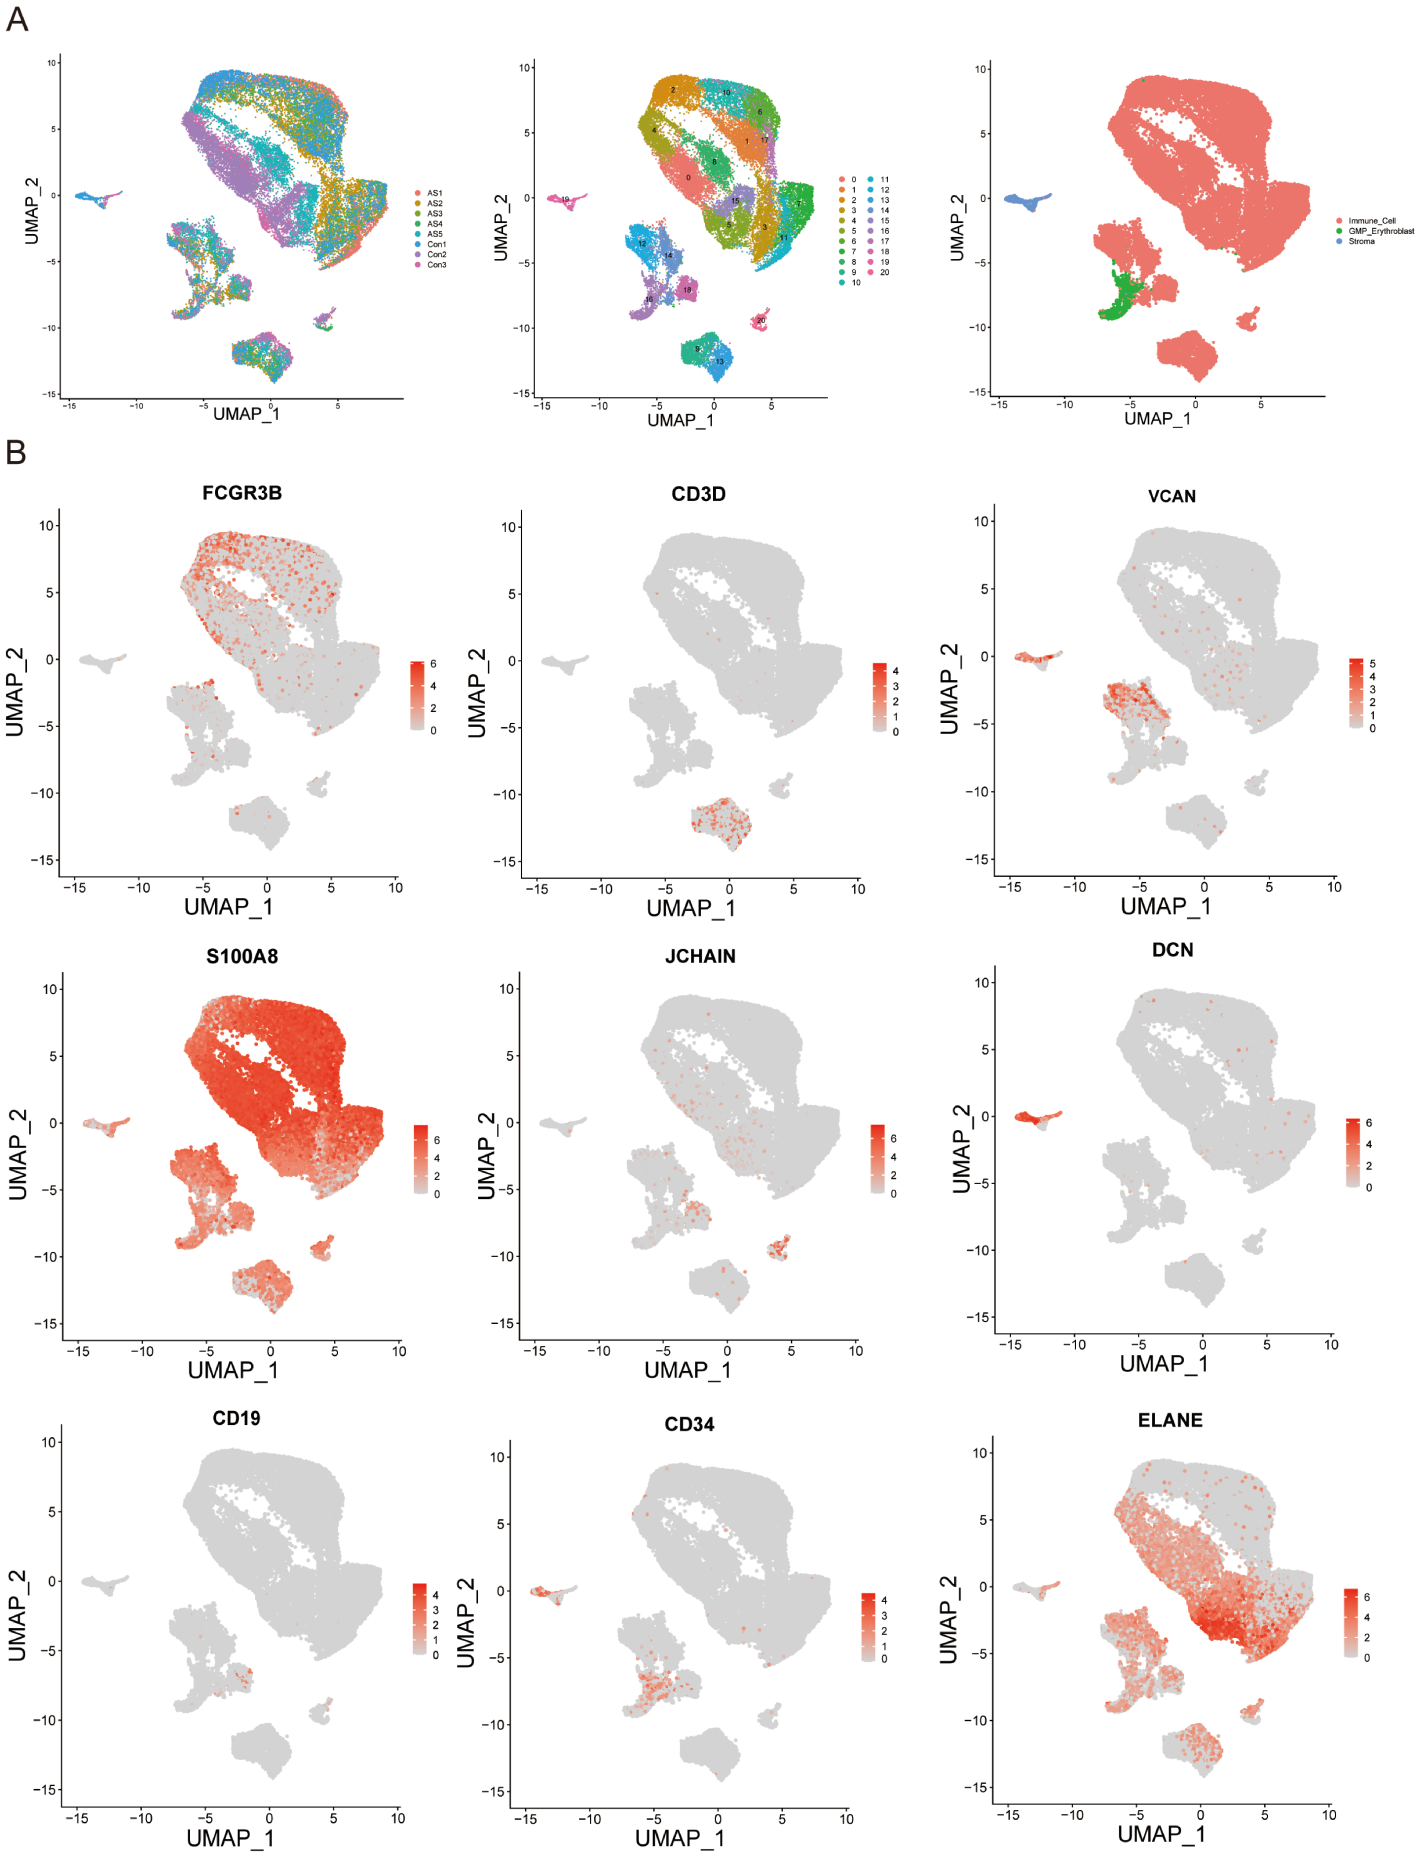

Supplement: inline-supplementary-material-6 [file inline-supplementary-material-6.pdf]
